# Supplementary material for: Psychological well-being in elderly adults with extraordinary episodic memory
Source: PLoS One. 2017 Oct 23;12(10):e0186413. doi: 10.1371/journal.pone.0186413 (PMC5653294; doi:10.1371/journal.pone.0186413)
Supplement: S1 File — This file contains the raw data used for analyses. (XLSX) [file pone.0186413.s001.xlsx]

## Sheet: Sheet1
Case	Group	Sex	Self-Reported Race	Education	WTAR_FSIQ	RAVLT_Delay_Raw	BNT_30_Raw	Animals_Raw	TMT_B_Raw_Time	PWB_Autonomy	PWB_Env_Mastery	PWB_Pers_Growth	PWB_Pos_Rel	PWB_Purp_Life	PWB_Self_Accept	SWLS_Total
1	0	0	0	20		5	24	26	194	41	35	37	39	35	37	20
2	0	0	0	20	125	4	29	20	57	32	37	32	36	33	39	33
3	0	0	0	12	118	7	17	11	67	30	41	32	33	40	35
4	0	1	0	14	96	7	28	21	49	40	42	41	33	42	41	34
5	0	0	0	16	109	7	28	15	99	31	37	34	33	40	39	30
6	0	1	0	18	119	6	26	19	122	31		37	36	33	35	27
7	0	0	0	18	120	6	27	10	117	39	36.5	42	33	38	32	21
8	0	1	0	18	122	7	29	26	102	31	39	33	38	33	38	21
9	0	1	1	18	99	6	22	15		33	39	38	38	34	35	33
10	0	1	0	18	119	7	28	20	73	39	37	42	36	39	40	25
11	0	1	0	16	121	7	26	23	84	36	40	35	42	37	38	28
12	0	1	0	20	123	6	30	26	74	30	41	42	39	41	41	32
13	0	1	1	17	117	7	29	14	240	35		38	35	28	40	31
14	0	0	0	16	116	7	28	27	67	26	38	38	39	35	35	29
15	0	1	0	6	108	8	30	23	118	37	30	32	27	38	31	20
16	0	1	0	12	101	3	27	18	111	27	37	35	33	37	29	23
17	0	1	0	18	121	6	29	21	77	38	37	40	39	34	36	22
18	0	1	0	18	117	5	28	21	94	42	33	41	38	32	37	22
19	0	0	0	20	113	7	24	20	99	34	34	27	32	39	33	20
20	1	1	0	14	114	11	29	26	87	35	41	37	40	31	38
21	1	1	0	12	119	13	29	28	51	29	42	34	38	36	39	35
22	1	1	0	13	118	13	29	20	75	36	42	34	42	42	37	33
23	1	1	0	13	116	9	28	28	79	37	42	35	38	28	34	26
24	1	1	0	14	112	9	29	23	69	33	42	41	40	38	32	32
25	1	1	0	12	111	11	29	25	67	32	42	38	41	40	31	34
26	1	0	0	16	123	13	30	21	46	31	38	32	30	34	35	17
27	1	1	0	14	112	9	28	22	60	34	34	35	36	35	39	18
28	1	1	0	18	119	13	24	21	141	39	35	34	40	37	41	28
29	1	0	0	18	125	11	28	26	55	34	42	37	41	37	42	29
30	1	0	0	18	125	10	29	24	94	25	36	33	36	29	33	28
31	1	1	0	19	119	10	28	20	102	38	40	40	40	38	39	26
32	1	1	0	16	119	13	21	22	146	37	41	42	42	42	40	21
33	1	1	0	18	114	9	26	24	83	25	29	26	32	29	29
34	1	1	0	14	113	10	27	24	133	37	37	38	35	38	37	27
35	1	0	0	16	116	12	29	18	79	33	41	37	32	34	38	32
36	1	0	0	16	102	10	30	26	108	30	37	33	41	41	40	33
37	1	1	0	17	125	13	28	18	105	28	37	30	37	35	35	32
38	1	0	0	19	122	11	30	27	52	40	42	40	38	41	40	30
39	1	1	0	18	122	11	29	27	67	36	38	38	28	41	40	30
40	1	1	0	16	117	9	25	18	69	35		42	42		42	29
41	1	1	0	12	111	13	28	12	78	36	40	42	41	39	41	32
42	1	1	0	16	114	12	30	17	79	33	41	36	42	41	40	30
43	1	1	0	18	115	11	28	22	107	34	42	42	42	38	41	31
44	1	1	0	14	118	11	27	18	74	33	36	36	35	33	34	28
45	1	0	0	22	124	9	30	31	114	39	38	36	41	40	34	28
46	1	0	0	18	122	9	29	25	52	33	41	39	40	35	41	29
47	1	1	0	14	116	10	29	22	45	41	34	42	42	41	42	26
48	1	1	0	20	124	13	29	18	63	34	40	35	41	37	37	29
49	1	1	0	16	118	11	27	23	88	36	42	36	42	36	36	29
50	1	1	1	13	89	10	26	13	77	41	42	34	41	40	37	27
LEGEND:	1 = SuperAger	1 = Female	1 = Black	Years Education	Weschler Test of Adult Reading Full Scale Intelligence Quotient	Rey Auditory Verbal Learning Test 20 minute delay raw score	30-item Boston Naming Test Raw Score	Semantic Fluency, Animals, Raw Score	Trail Making Test Part-B Raw Score in seconds	PWB-42 Autonomy	PWB-42 Environmental Mastery	PWB-42 Personal Growth	PWB-42 Positive Relations with Others	PWB-42 Purpose in Life	PWB-42 Self-Acceptance	Satisfaction with Life Total Score
	0 = Elderly Control	0 = Male	0 = White
